# Supplementary material for: Derivation of hypermethylated pluripotent embryonic stem cells with high potency
Source: PubMed Central journal article supplement (PMC5752839; doi:10.1038/cr.2017.134), 2017-10-27
Supplement: cr2017134x5.pdf [file cr2017134x5.pdf]

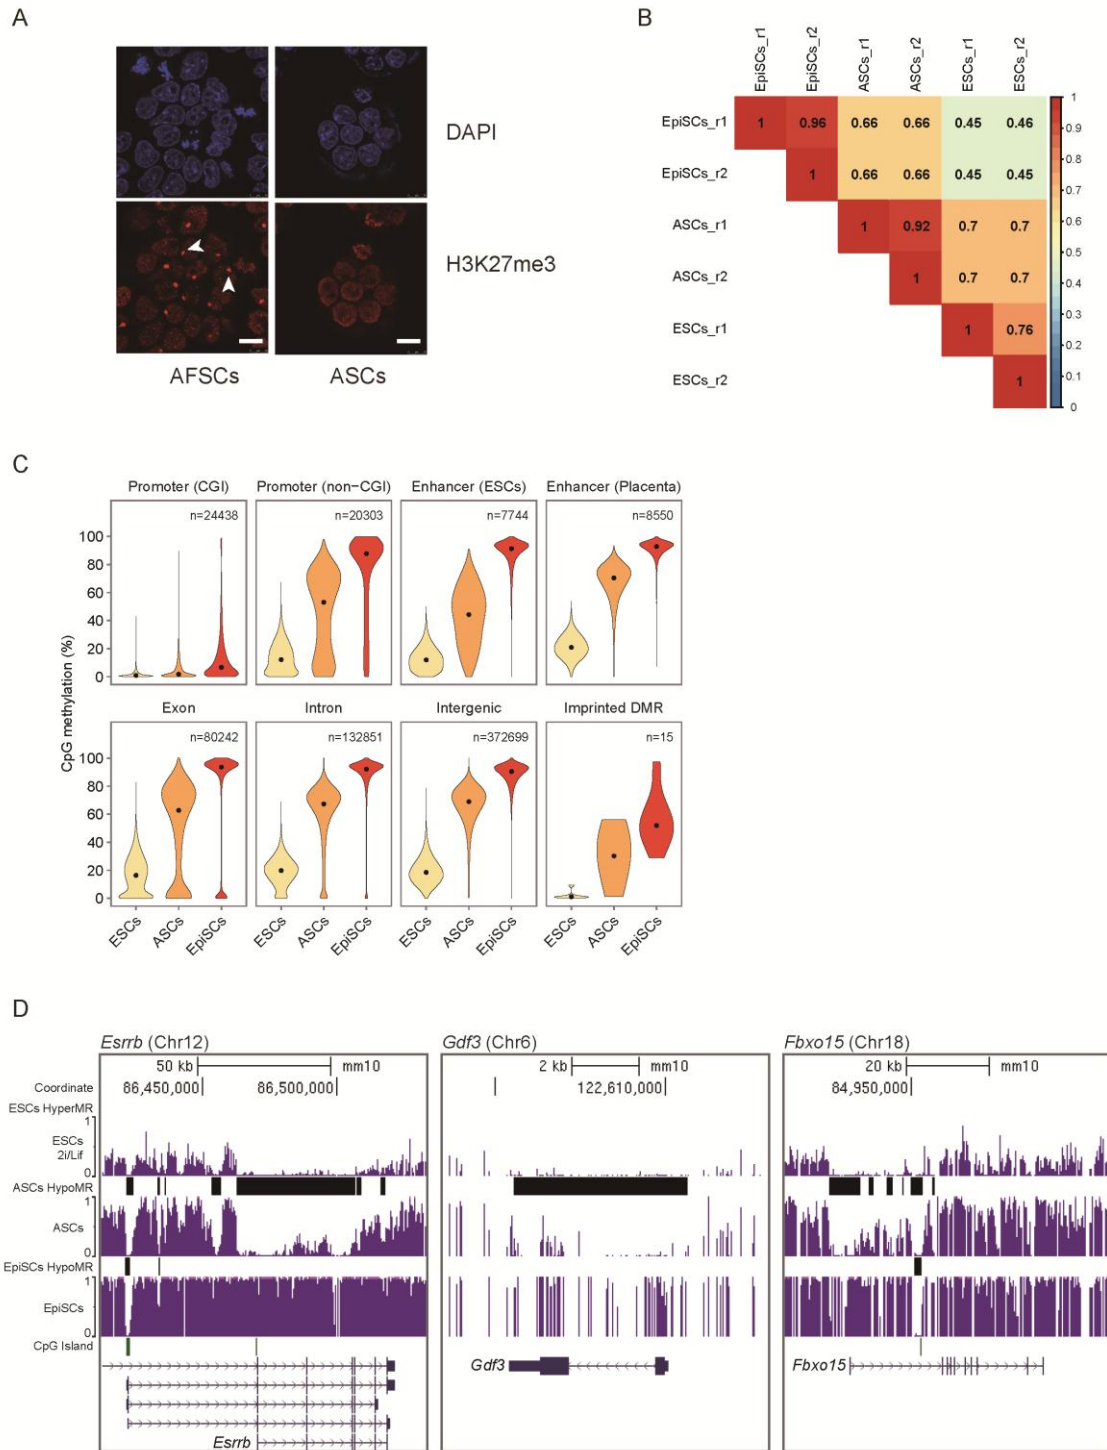

**Supplementary information Figure 5 Methylation landscape of ASCs.**

**(A)** X-chromosome inactivated in AFSCs, and reactivated in ASCs confirmed by lack of H3K27me3 spot. Arrowheads show X-chromosome inactivation with H3K27me3 spots in AFSCs. Scale bars, 20 $\mu$ m. **(B)** Correlation analysis of CpG methylation level of 2 kb genomic tiles between ESCs, ASCs and EpiSCs. Pearson correlation coefficient indicated. **(C)** Violin plot showing DNA methylation distribution at various genomic features. **(D)** UCSC genome browser snapshot of CpG methylation level at representative naive pluripotency genes.
