# Supplementary material for: Derivation of hypermethylated pluripotent embryonic stem cells with high potency
Source: PubMed Central journal article supplement (PMC5752839; doi:10.1038/cr.2017.134), 2017-10-27
Supplement: cr2017134x6.pdf [file cr2017134x6.pdf]

**A**

| Stage of Embryo (collected) | Cell line (AFSCs) | No. of transferred embryos | No. of collected embryos | No. of LacZ positive embryos |
|-----------------------------|-------------------|----------------------------|--------------------------|------------------------------|
| E6.5                        | R1                | 32                         | 28 (88%)                 | 3 (11%)                      |
| E6.5                        | R4                | 20                         | 14 (70%)                 | 2 (14%)                      |
| E7.5                        | R4                | 100                        | 89 (89%)                 | 11 (12%)                     |
| E8.5                        | R4                | 42                         | 22 (52%)                 | 3 (14%)                      |

**B**

| kind of cell lines | Cell line | Derived ASCs | Repeat times |
|--------------------|-----------|--------------|--------------|
| G-3                | AFSCs     | yes          | 6            |
| G-12               | AFSCs     | yes          | 2            |
| G-6                | AFSCs     | no           | 1            |
| G-4                | AFSCs     | no           | 1            |
| ST2                | AFSCs     | yes          | 1            |
| total              | AFSCs     | 3/5 (60%)    |              |
| GOF-GFP            | EpiSCs    | no           | 2            |
| x-GFP              | EpiSCs    | yes          | 2            |
| ge-wild type       | EpiSCs    | no           | 1            |
| stella-GFP         | EpiSCs    | no           | 3            |
| total              | EpiSCs    | 1/4 (25%)    |              |

**C**

| Stage of Embryo (collected) | Cell line         | No. of injected cell | No. of Transferred embryos | No. of collected embryos | No. of Gonad GPF+ | No. of contribute body | No. of contribute yolk sack | No. of contribute placenta |
|-----------------------------|-------------------|----------------------|----------------------------|--------------------------|-------------------|------------------------|-----------------------------|----------------------------|
| E12.5                       | ASCs (Stella-GFP) | ~15 cells            | 32                         | 4 (13%)                  | 3 (75%)           | 4 (100%)*              | 4 (100%)*                   | 4 (100%)*                  |
| E12.5                       | ASCs (GOF-GFP)    | ~15 cells            | 37                         | 6 (16%)                  | 5 (83%)           | 6 (100%)*              | 6 (100%)*                   | 6 (100%)*                  |

\* confirmed by Genomic PCR

**D**

| Stage of Embryo | Cell line | No. of injected cell | No. of Transferred embryos | No. of pups | No. of chimera | No. of ♂,♀ |
|-----------------|-----------|----------------------|----------------------------|-------------|----------------|------------|
| Full term       | ASCs      | ~15 cells            | 49                         | 29 (59%)    | 6 (21%)        | 5, 1       |

**E**

| Stage of Embryo (collected) | Cell line         | No. of injected cell | No. of Transferred embryos | No. of collected embryos | No. of tdTomato positive | No. of Gonad GPF+ | No. of contribute body | No. of contribute body+yolk sack | No. of contribute body+yolk sack+placenta |
|-----------------------------|-------------------|----------------------|----------------------------|--------------------------|--------------------------|-------------------|------------------------|----------------------------------|-------------------------------------------|
| E10.5                       | ASCs (GFP/Tomato) | ~15 cells            | 20                         | 6 (30%)                  | 6 (100%)                 |                   | 6 (100%)               | 6 (100%)                         | 5 (83%)                                   |
| E13.5                       | ASCs (GFP/Tomato) | ~15 cells            | 14                         | 4 (29%)                  | 4 (100%)                 | 4 (100%)          | 4 (100%)               | 4 (100%)                         | 2 (50%)                                   |

**F**

| No. of recipients | Cell line | No. of injected cell | No. of Transferred embryos (2N+4N) left/right | No. of pups (2N+4N) | No. of 4N pups | No. of dead pups in 2 days | No. of 4N surviving pups | No. of ♂,♀ |
|-------------------|-----------|----------------------|-----------------------------------------------|---------------------|----------------|----------------------------|--------------------------|------------|
| No.1              | G-12 ASCs | ~15 cells            | 5+7/5+7                                       | 5+5                 | 5 (36%)        | 2 (4N)                     | 3 (21%)                  | 3, 0       |
| No.2              | G-12 ASCs | ~15 cells            | 5+7/5+7                                       | 4+2                 | 2 (14%)        | 0                          | 2 (14%)                  | 2, 0       |
| No.3              | G-12 ASCs | ~15 cells            | 5+7/5+7                                       | 5+0                 | 0              | 0                          | 0                        | 0          |
| No.4              | G-12 ASCs | ~15 cells            | 5+7/5+7                                       | 0                   | 0              | 0                          | 0                        | 0          |
| No.5              | G-12 ASCs | ~15 cells            | 5+7/5+7                                       | 0                   | 0              | 0                          | 0                        | 0          |
| Total             | G-12 ASCs | ~15 cells            | 30/42                                         | 14+7                | 7/42(17%)      | 2(4N)                      | 5/42(12%)                | 5, 0       |

**Supplementary information Table 1** The contribution of AFSCs and ASCs in chimera and tetraploid.

**(A)** Summary of chimeras derived from AFSCs R1 and R4 cell lines with Rosa26-lacZ reporter at E6.5-E8.5. **(B)** Derivation rate of ASCs. AFSCs cell lines are green, control EpiSCs are yellow. **(C)** Contribution of ASCs with GOF-GFP reporter and Stella-GFP reporter in E12.5 chimeras. **(D)** The number of full term chimeric pups derived from ASCs. **(E)** Contribution of 2N ASCs (GOF-GFP/dtTomato) at E10.5 and E13.5. **(F)** The result of potency test by injecting ASCs to tetraploid embryos.
