# Supplementary material for: Derivation of hypermethylated pluripotent embryonic stem cells with high potency
Source: PubMed Central journal article supplement (PMC5752839; doi:10.1038/cr.2017.134), 2017-10-27
Supplement: cr2017134x7.pdf [file cr2017134x7.pdf]

**A**

| Stage of Embryo (collected) | Cell line | No. of injected cell | No. of transferred embryos | No. of collected embryos | No. of tdTomato positive | No. of contributed epiblast | No. of contributed VE | No. of contributed epiblast+EXE |
|-----------------------------|-----------|----------------------|----------------------------|--------------------------|--------------------------|-----------------------------|-----------------------|---------------------------------|
| E6.5                        | ASCs      | single cell          | 62                         | 36 (58%)                 | 13 (36%)                 | 13 (100%)                   | 0                     | 1 (7%)                          |
| E7.5                        | ASCs      | single cell          | 58                         | 29 (50%)                 | 7 (24%)                  | 7 (100%)                    | 0                     | 0                               |

  

| Stage of Embryo (collected) | Cell line   | No. of injected cell | No. of transferred embryos | No. of collected embryos | No. of tdTomato positive | No. of contributed body | No. of contributed body+yolk sac | No. of contributed body+yolk sac+placenta |
|-----------------------------|-------------|----------------------|----------------------------|--------------------------|--------------------------|-------------------------|----------------------------------|-------------------------------------------|
| E8.5                        | ASCs        | single cell          | 30                         | 12 (40%)                 | 6 (50%)                  | 6 (100%)                | 4 (67%)                          | 4 (67%)                                   |
| E9.5                        | ASCs        | single cell          | 30                         | 15 (50%)                 | 7 (47%)                  | 7 (100%)                | 7 (100%)                         | 5 (71%)                                   |
| E10.5                       | ASCs        | single cell          | 60                         | 16 (27%)                 | 5 (31%)                  | 5 (100%)                | 5 (100%)                         | 5 (100%)                                  |
| <b>E8.5-E10.5</b>           | <b>ASCs</b> | <b>single cell</b>   | <b>120</b>                 | <b>43 (36%)</b>          | <b>18 (42%)</b>          | <b>18 (100%)</b>        | <b>16 (89%)</b>                  | <b>14 (78%)</b>                           |

**B**

| Stage of Embryo (collected) | Cell line | No. of injected cell | No. of transferred embryos | No. of collected embryos | No. of tdTomato positive | No. of Gonad GPF+ | No. of contributed body+yolk sac+placenta |
|-----------------------------|-----------|----------------------|----------------------------|--------------------------|--------------------------|-------------------|-------------------------------------------|
| E12.5                       | ASCs      | single cell          | 36                         | 13 (36%)                 | 6 (46%)                  | 6 (100%)          | 6 (100%)                                  |

**C**

| Stage of Embryo | Cell line | No. of injected cell | No. of Transferred embryos | No. of pups | No. of chimera | No. of ♂,♀ |
|-----------------|-----------|----------------------|----------------------------|-------------|----------------|------------|
| Full term       | ASCs      | single cell          | 56                         | 16 (29%)    | 7 (44%)        | 5, 2       |

**D**

| Stage of Embryo (collected) | Cell line           | No. of injected cell | No. of Transferred embryos | No. of collected embryos | No. of tdTomato positive | No. of contributed Epiblast | No. of contributed EXE | No. of contributed body | No. of contributed body+yolk | No. of contributed body+yolk sac +placenta |
|-----------------------------|---------------------|----------------------|----------------------------|--------------------------|--------------------------|-----------------------------|------------------------|-------------------------|------------------------------|--------------------------------------------|
| E6.5                        | SQ3.3-2i/LIF        | ~15 cells            | 20                         | 10 (50%)                 | 5 (50%)                  | 5 (100%)                    | 0                      |                         |                              |                                            |
| E7.5                        | SQ3.3-2i/LIF        | ~15 cells            | 20                         | 8 (40%)                  | 3 (38%)                  | 3 (100%)                    | 0                      |                         |                              |                                            |
| E10.5                       | SQ3.3-2i/LIF        | ~15 cells            | 44                         | 23 (52%)                 | 18 (78%)                 |                             |                        | 18 (100%)               | 6 (33%)                      | 1 (6%)                                     |
| <b>E10.5</b>                | <b>SQ3.3-2i/LIF</b> | <b>single cell</b>   | <b>45</b>                  | <b>20 (44%)</b>          | <b>2 (10%)</b>           |                             |                        | <b>2 (100%)</b>         | <b>0</b>                     | <b>0</b>                                   |

**E**

| Stage of Embryo (collected) | Cell line             | No. of injected cell | No. of transferred embryos | No. of collected embryos | No. of tdTomato positive | No. of contributed body | No. of contributed body+yolk | No. of contributed body+yolk sac+placenta |
|-----------------------------|-----------------------|----------------------|----------------------------|--------------------------|--------------------------|-------------------------|------------------------------|-------------------------------------------|
| E10.5                       | E14/ESC-ASCs          | ~15 cells            | 34                         | 22(65%)                  | 11(50%)                  | 11(100%)                | 11(100%)                     | 10(91%)                                   |
| E10.5                       | SQ3.3/ESC-ASCs        | ~15 cells            | 47                         | 18(38%)                  | 8(44%)                   | 8(100%)                 | 8(100%)                      | 8(100%)                                   |
| <b>E10.5</b>                | <b>SQ3.3/ESC-ASCs</b> | <b>single cell</b>   | <b>17</b>                  | <b>15(88%)</b>           | <b>6(40%)</b>            | <b>6(100%)</b>          | <b>6(100%)</b>               | <b>6(100%)</b>                            |

**Supplementary information Table 2** The summary of contribution of ASCs and ESC-ASCs in chimeras.

**(A)** Contribution of single ASC (GOF-GFP/tdTomato) to chimeras at E6.5-E7.5 and E8.5-E10.5. **(B)** Contribution of single ASC (GOF-GFP/tdTomato) in E12.5 chimeras. **(C)** Full term chimeric pups were derived by single ASC. **(D)** Summary of chimeras derived from control ESCs, and collected at E6.5-E10.5. **(E)** Contribution of ESC-ASCs (GOF-GFP/tdTomato) in E10.5 chimeras.
